# Supplementary material for: Introducing Three-Dimensional Scanning for Phenotyping of Olive Fruits Based on an Extensive Germplasm Survey
Source: MDPI journal article supplement (doi:10.3390/plants11111501), 2022-06-02
Supplement: s1 [file s1]

**Table S1.** Endocarp 3D morphological traits of 50 olive varieties. Ten endocarp samples were analyzed for each variety (n=10)

| Cultivar                    | Mean values $\pm$ Standard Error |                         |                               |                                 |                                          |                                  |                               |
|-----------------------------|----------------------------------|-------------------------|-------------------------------|---------------------------------|------------------------------------------|----------------------------------|-------------------------------|
|                             | Volume<br>(cm <sup>3</sup> )     | Area (cm <sup>2</sup> ) | Up-skin<br>(cm <sup>2</sup> ) | Down-skin<br>(cm <sup>2</sup> ) | Center of<br>gravity<br>(size) x<br>(cm) | Center of<br>gravity<br>(size) y | Center of gravity<br>(size) z |
| Adramitini                  | 0.69 $\pm$ 0.016<br>r-u          | 4.15 $\pm$ 0.070<br>o-s | 0.20 $\pm$ 0.009<br>g         | 0.24 $\pm$ 0.013<br>ab          | 9.32 $\pm$ 0.064<br>n-r                  | 9.35 $\pm$ 0.078<br>k-p          | 15.97 $\pm$ 0.234<br>i-p      |
| Aggouromanakolia            | 0.49 $\pm$ 0.021<br>i-n          | 3.34 $\pm$ 0.108<br>i-n | 0.08 $\pm$ 0.028<br>a-f       | 0.07 $\pm$ 0.024<br>a           | 8.09 $\pm$ 0.112<br>d-o                  | 8.19 $\pm$ 0.095<br>d-m          | 15.43 $\pm$ 0.397<br>h-o      |
| Amfissis                    | 0.68 $\pm$ 0.065<br>q-t          | 4.20 $\pm$ 0.252<br>p-s | 0.17 $\pm$ 0.044<br>a-e       | 0.11 $\pm$ 0.028<br>ab          | 9.35 $\pm$ 0.128<br>n-r                  | 9.42 $\pm$ 0.335<br>l-p          | 16.83 $\pm$ 0.499<br>i-q      |
| Amigdalolia                 | 0.65 $\pm$ 0.032<br>p-s          | 4.28 $\pm$ 0.154<br>q-s | 0.00 $\pm$ 0.000<br>a         | 0.10 $\pm$ 0.030<br>a           | 7.10 $\pm$ 0.050<br>h-p                  | 8.63 $\pm$ 0.227<br>g-o          | 19.86 $\pm$ 0.572<br>s-t      |
| Arbequina                   | 0.27 $\pm$ 0.008<br>b-d          | 2.12 $\pm$ 0.040<br>b-d | 0.18 $\pm$ 0.006<br>e-g       | 0.15 $\pm$ 0.009<br>ab          | 7.10 $\pm$ 0.050<br>b-i                  | 7.13 $\pm$ 0.089<br>b-h          | 10.23 $\pm$ 0.225<br>ab       |
| Asprolia<br>Alexandroupolis | 0.56 $\pm$ 0.027<br>l-r          | 3.65 $\pm$ 0.116<br>k-r | 0.13 $\pm$ 0.032<br>b-f       | 0.18 $\pm$ 0.017<br>ab          | 9.30 $\pm$ 0.135<br>n-r                  | 8.97 $\pm$ 0.218<br>i-p          | 15.10 $\pm$ 0.267<br>h-n      |
| Asprolia Lefkados           | 0.28 $\pm$ 0.008<br>b-e          | 2.35 $\pm$ 0.042<br>b-f | 0.00 $\pm$ 0.000<br>a         | 0.06 $\pm$ 0.019<br>a           | 6.48 $\pm$ 0.102<br>bc                   | 6.46 $\pm$ 0.108<br>b-d          | 14.29 $\pm$ 0.112<br>e-j      |
| Chalkidikis                 | 0.87 $\pm$ 0.043<br>v-w          | 5.27 $\pm$ 0.166<br>u   | 0.07 $\pm$ 0.027<br>a-f       | 0.12 $\pm$ 0.029                | 10.99 $\pm$<br>0.348 s                   | 11.23 $\pm$ 0.178<br>q           | 19.77 $\pm$ 0.378             |

|                           |                      |                     |                     |                    |                     |                      |                      |
|---------------------------|----------------------|---------------------|---------------------|--------------------|---------------------|----------------------|----------------------|
|                           |                      |                     |                     | a                  |                     |                      | r-s                  |
| Chondrolia<br>Chalkidikis | 0.66 ± 0.035<br>p-s  | 4.30 ± 0.151<br>r-t | 0.06 ± 0.020<br>a-f | 0.12 ± 0.021<br>a  | 9.96 ± 0.262<br>p-s | 10.14 ± 0.166<br>n-q | 17.45 ± 0.365<br>o-r |
| Chrisolia                 | 0.32 ± 0.008<br>b-h  | 2.09 ± 0.209<br>bc  | 0.21 ± 0.014<br>g   | 0.22 ± 0.011<br>ab | 8.31 ± 0.106<br>a   | 8.31 ± 0.094<br>e-m  | 9.12 ± 0.156<br>a    |
| Dafnelia                  | 0.417 ± 0.020<br>e-l | 2.97 ± 0.097<br>e-l | 0.17 ± 0.056<br>e-g | 0.24 ± 0.039<br>ab | 9.28 ± 0.322<br>n-r | 9.41 ± 0.555<br>l-p  | 11.80 ± 0.854<br>b-d |
| Dopia Zakinthou           | 0.298 ± 0.010<br>b-f | 2.40 ± 0.054<br>b-g | 0.00 ± 0.000<br>a   | 0.07 ± 0.020<br>a  | 6.45 ± 0.671<br>a-c | 7.01 ± 0.178<br>b-g  | 13.37 ± 0.316<br>d-h |
| Frantoio                  | 0.354 ± 0.012<br>g-m | 2.71 ± 0.059<br>c-i | 0.00 ± 0.000<br>a   | 0.07 ± 0.020<br>a  | 7.48 ± 0.103<br>b-k | 7.19 ± 0.116<br>b-h  | 14.75 ± 0.295<br>f-m |
| Frantoio Rodou            | 0.449 ± 0.014<br>a   | 3.14 ± 0.074<br>h-m | 0.04 ± 0.019<br>ab  | 0.07 ± 0.023<br>a  | 8.27 ± 0.166<br>a   | 8.05 ± 0.119<br>c-l  | 15.05 ± 0.309<br>h-n |
| Gaidourelia               | 1.243 ± 0.42<br>x    | 7.20 ± 0.158<br>v   | 0.04 ± 0.029<br>a-c | 0.06 ± 0.026<br>a  | 10.47 ±<br>0.173 rs | 10.32 ± 0.337<br>o-q | 28.93 ± 0.609<br>v   |
| Galatistas                | 0.422 ± 0.033<br>a   | 3.06 ± 0.162<br>e-l | 0.00 ± 0.000<br>a   | 0.04 ± 0.018<br>a  | 7.51 ± 0.244<br>b-k | 7.62 ± 0.175<br>b-k  | 15.89 ± 0.437<br>i-p |
| Kalamon                   | 0.613 ± 0.046<br>n-r | 3.57 ± 0.411<br>k-q | 0.00 ± 0.000<br>a   | 0.02 ± 0.016<br>a  | 8.10 ± 0.237<br>e-o | 17.10 ± 1.474<br>r   | 10.45 ± 1.709<br>a-c |
| Kalokerida                | 0.489 ± 0.029<br>i-n | 3.39 ± 0.130<br>i-n | 0.03 ± 0.024<br>ab  | 0.10 ± 0.023<br>a  | 8.62 ± 0.262<br>i-p | 9.20 ± 0.735<br>j-p  | 14.99 ± 0.602<br>g-n |

|                      |                      |                     |                     |                    |                     |                     |                      |
|----------------------|----------------------|---------------------|---------------------|--------------------|---------------------|---------------------|----------------------|
| Karolia              | 0.813 ± 0.017<br>t-v | 5.05 ± 0.071<br>u   | 0.00 ± 0.000<br>a   | 0.00 ± 0.000<br>a  | 8.77 ± 0.121<br>i-q | 8.74 ± 0.107<br>g-P | 23.31 ± 0.253<br>u   |
| Karidolia            | 0.909 ± 0.044<br>v-w | 5.17 ± 0.157<br>u   | 0.03 ± 0.017<br>ab  | 0.02 ± 0.018<br>a  | 9.64 ± 0.163<br>o-s | 9.82 ± 0.235<br>m-q | 21.03 ± 0.292<br>tu  |
| Kolireiki Ilias      | 0.498 ± 0.011<br>i-o | 3.55 ± 0.061<br>k-p | 0.00 ± 0.000<br>a   | 0.00 ± 0.000<br>a  | 7.72 ± 0.096<br>b-m | 7.70 ± 0.100<br>b-l | 17.99 ± 0.232<br>p-s |
| Kolimbada            | 1.011 ± 0.023<br>w   | 5.41 ± 0.094<br>u   | 0.11 ± 0.034<br>a-g | 0.26 ± 0.016<br>ab | 10.49 ±<br>0.990 rs | 11.48 ± 0.117<br>q  | 16.62 ± 0.286<br>k-q |
| Koroneiki            | 0.121 ± 0.008<br>a   | 1.28 ± 0.040<br>a   | 0.00 ± 0.000<br>a   | 0.00 ± 0.000<br>a  | 4.92 ± 0.080<br>a   | 4.52 ± 0.408<br>a   | 10.42 ± 0.204<br>a-c |
| Kothreiki            | 0.596 ± 0.031<br>n-r | 3.73 ± 0.138<br>m-r | 0.13 ± 0.024<br>b-g | 0.10 ± 0.020<br>a  | 8.87 ± 0.193<br>i-q | 8.81 ± 0.168<br>h-p | 15.21 ± 0.340<br>h-o |
| Koutsourelia         | 0.319 ± 0.014<br>b-h | 2.30 ± 0.211<br>b-e | 0.00 ± 0.000<br>a   | 0.00 ± 0.000<br>a  | 6.57 ± 0.634<br>b-e | 7.11 ± 0.115<br>b-h | 14.80 ± 0.309<br>f-m |
| Lefkolia Serron      | 0.49 ± 0.027<br>i-n  | 3.48 ± 0.119<br>j-o | 0.00 ± 0.000<br>a   | 0.01 ± 0.012<br>a  | 6.96 ± 0.740<br>b-h | 7.72 ± 0.150<br>b-l | 18.66 ± 0.290<br>q-s |
| Lianolia Kerkiras    | 0.379 ± 0.021<br>c-j | 2.96 ± 0.111<br>e-k | 0.00 ± 0.000<br>a   | 0.00 ± 0.000<br>a  | 6.93 ± 0.193<br>b-h | 6.66 ± 0.268<br>b-e | 17.23 ± 0.418<br>n-q |
| Lianomanako<br>Tirou | 0.366 ± 0.008<br>c-e | 2.75 ± 0.045<br>c-h | 0.14 ± 0.006<br>b-g | 0.11 ± 0.012<br>a  | 7.40 ± 0.073<br>b-j | 7.47 ± 0.075<br>b-j | 13.13 ± 0.150<br>d-h |
| Makris               | 0.40 ± 0.260<br>d-k  | 2.82 ± 0.118<br>d-j | 0.17 ± 0.033<br>d-g | 0.16 ± 0.023<br>ab | 8.36 ± 0.215<br>g-o | 8.44 ± 0.239        | 12.35 ± 0.185        |

|                   |                      |                     |                     |                    |                      |                     |                      |
|-------------------|----------------------|---------------------|---------------------|--------------------|----------------------|---------------------|----------------------|
|                   |                      |                     |                     |                    |                      | f-n                 | b-e                  |
| Manzanilla        | 0.517 ± 0.013<br>j-p | 3.53 ± 0.056<br>j-p | 0.15 ± 0.020<br>c-g | 0.00 ± 0.000<br>a  | 8.17 ± 0.091<br>e-o  | 8.08 ± 0.112<br>c-m | 16.92 ± 0.250<br>l-q |
| Mastoidis         | 0.284 ± 0.005<br>b-e | 2.39 ± 0.033<br>b-g | 0.00 ± 0.000<br>a   | 0.00 ± 0.000<br>a  | 6.29 ± 0.031<br>ab   | 6.27 ± 0.047<br>b   | 15.23 ± 0.182<br>h-o |
| Matolia Ilias     | 0.241 ± 0.010<br>a-c | 2.07 ± 0.064<br>ab  | 0.00 ± 0.000<br>a   | 0.07 ± 0.019<br>a  | 6.39 ± 0.112<br>a-c  | 6.43 ± 0.106<br>bc  | 12.54 ± 0.175<br>b-f |
| Mavrelia          | 0.287 ± 0.014<br>b-f | 2.39 ± 0.085<br>b-g | 0.00 ± 0.000<br>a   | 0.02 ± 0.015<br>a  | 6.54 ± 0.120<br>b-d  | 6.51 ± 0.123<br>b-d | 14.68 ± 0.298<br>f-l |
| Mavrelia Serron   | 0.557 ± 0.012<br>l-r | 3.59 ± 0.047<br>k-r | 0.10 ± 0.024<br>a-g | 0.21 ± 0.011<br>ab | 8.72 ± 0.118<br>i-q  | 8.79 ± 0.105<br>h-p | 15.08 ± 0.219<br>h-n |
| Mavrelia Lefkadas | 0.305 ± 0.013<br>b-g | 2.43 ± 0.070<br>b-h | 0.01 ± 0.011<br>a   | 0.03 ± 0.019<br>a  | 6.85 ± 0.097<br>b-g  | 6.79 ± 0.075<br>b-f | 13.78 ± 0.231<br>d-i |
| Megaritiki        | 0.422 ± 0.009<br>e-l | 3.21 ± 0.048<br>i-m | 0.00 ± 0.000<br>a   | 0.02 ± 0.049<br>ab | 7.36 ± 0.082<br>b-j  | 7.33 ± 0.063<br>b-i | 18.21 ± 0.224<br>p-s |
| Mirtolia          | 0.451 ± 0.024<br>h-m | 3.08 ± 0.110<br>g-m | 0.10 ± 0.023<br>a-g | 0.20 ± 0.031<br>ab | 7.88 ± 0.173<br>c-n  | 7.87 ± 0.156<br>b-l | 14.33 ± 0.229<br>e-k |
| Petrolia          | 0.88 ± 0.053<br>v-w  | 4.83 ± 0.190<br>s-u | 0.36 ± 0.032<br>h   | 0.21 ± 0.031<br>ab | 10.22 ±<br>0.256 p-s | 10.43 ± 0.221<br>pq | 16.42 ± 0.372<br>j-q |
| Picual            | 0.586 ± 0.023<br>m-r | 3.99 ± 0.111<br>n-r | 0.19 ± 0.016<br>b-g | 0.08 ± 0.027<br>a  | 8.96 ± 0.210<br>k-r  | 8.43 ± 0.131<br>f-n | 17.20 ± 0.254<br>n-q |

|                        |                      |                     |                     |                    |                     |                     |                      |
|------------------------|----------------------|---------------------|---------------------|--------------------|---------------------|---------------------|----------------------|
| Pierias                | 0.637 ± 0.024<br>o-r | 4.02 ± 0.106<br>n-r | 0.04 ± 0.021<br>ab  | 0.14 ± 0.026<br>ab | 8.84 ± 0.155<br>i-q | 8.15 ± 0.560<br>c-m | 17.80 ± 0.328<br>p-s |
| Pierias Skotiniotiki   | 0.822 ± 0.031<br>u-v | 4.77 ± 0.153<br>s-u | 0.07 ± 0.026<br>a-f | 0.20 ± 0.021<br>ab | 9.27 ± 0.124<br>m-r | 9.31 ± 0.203<br>k-p | 20.02 ± 0.298<br>s-t |
| Pikrolia               | 0.43 ± 0.009<br>f-l  | 3.08 ± 0.042<br>g-m | 0.14 ± 0.008<br>b-g | 0.02 ± 0.015<br>a  | 7.69 ± 0.109<br>b-l | 7.62 ± 0.095<br>b-k | 14.81 ± 0.165<br>f-m |
| Rachati                | 0.22 ± 0.010<br>ab   | 1.93 ± 0.061<br>ab  | 0.00 ± 0.000<br>a   | 0.00 ± 0.000<br>a  | 6.37 ± 0.090<br>a-c | 6.26 ± 0.089<br>ab  | 12.70 ± 0.304<br>c-g |
| Stroggilolia           | 0.648 ± 0.029<br>p-s | 4.00 ± 0.011<br>n-r | 0.05 ± 0.029<br>a-d | 0.18 ± 0.012<br>ab | 9.07 ± 0.215<br>l-r | 9.08 ± 0.238<br>j-p | 17.02 ± 0.298<br>m-q |
| Thiaki                 | 0.25 ± 0.008<br>a-c  | 2.13 ± 0.048<br>b-d | 0.00 ± 0.000<br>a   | 0.04 ± 0.018<br>a  | 6.69 ± 0.066<br>b-f | 6.64 ± 0.060<br>b-e | 12.28 ± 0.221<br>b-e |
| Throumbolia<br>Thassou | 0.519 ± 0.021<br>j-p | 3.61 ± 0.093<br>k-r | 0.01 ± 0.011<br>a   | 0.06 ± 0.021<br>a  | 7.84 ± 0.143<br>b-n | 7.70 ± 0.143<br>b-l | 18.45 ± 0.255<br>q-s |
| Throubolia             | 0.541 ± 0.013<br>k-q | 3.67 ± 0.067<br>k-r | 0.00 ± 0.000<br>a   | 0.08 ± 0.021<br>a  | 8.24 ± 0.088<br>f-o | 8.05 ± 0.052<br>c-l | 18.11 ± 0.317<br>p-s |
| Tragolia               | 0.243 ± 0.008<br>a-c | 2.05 ± 0.045<br>bc  | 0.08 ± 0.018<br>a-f | 0.04 ± 0.018<br>a  | 6.42 ± 0.071<br>a-c | 6.46 ± 0.101<br>b-d | 11.68 ± 0.190<br>b-d |
| Valanolia              | 0.559 ± 0.015<br>l-r | 3.68 ± 0.057<br>l-r | 0.06 ± 0.023<br>a-d | 0.22 ± 0.030<br>ab | 8.82 ± 0.177<br>i-q | 8.59 ± 0.196<br>g-o | 15.89 ± 0.237<br>i-p |
| Vasilikada             | 0.787 ± 0.032<br>s-v | 5.01 ± 0.134<br>t-u | 0.03 ± 0.023<br>ab  | 0.04 ± 0.022       | 8.86 ± 0.176        | 8.79 ± 0.180        | 21.57 ± 0.286        |

---

| Source   | df | Volume<br>(cm <sup>3</sup> ) | Area (cm <sup>2</sup> ) | Up-skin (cm <sup>2</sup> ) | Down-skin<br>(cm <sup>2</sup> ) | Center of<br>gravity<br>(size) x<br>(cm) | Center of<br>gravity<br>(size) y<br>(cm) | Center of<br>gravity<br>(size) z<br>(cm) |
|----------|----|------------------------------|-------------------------|----------------------------|---------------------------------|------------------------------------------|------------------------------------------|------------------------------------------|
|          |    |                              |                         |                            |                                 |                                          |                                          |                                          |
| (a)      |    |                              |                         |                            |                                 |                                          |                                          |                                          |
| Cultivar | 49 | 81.99<br>g***                | 79.336***               | 15.599***                  | 1.536*                          | 23.011***                                | 37.397***                                | 76.022*<br>**                            |

(a) Values

of F: \*P< 0.05 \*\*P< 0.01 \*\*\*P< 0.001

(b) Mean values for each measured parameter within factor, with the same letter are not significantly different (P<0.05) LSD test.

**Table S2.** Fruit 3D morphological traits of 50 olive varieties. Five fruit samples were analyzed for each variety (n=5).

| Cultivars        | Mean values ± Standard Error |                         |                               |                                 |                                       |                                       |                                    |
|------------------|------------------------------|-------------------------|-------------------------------|---------------------------------|---------------------------------------|---------------------------------------|------------------------------------|
|                  | Volume<br>(cm <sup>3</sup> ) | Area (cm <sup>2</sup> ) | Up-skin<br>(cm <sup>2</sup> ) | Down-skin<br>(cm <sup>2</sup> ) | Center of<br>gravity<br>(size) x (cm) | Center of<br>gravity<br>(size) y (cm) | Center of gravity (size)<br>z (cm) |
| Adramitini       | 3.21 ± 0.136<br>d-h          | 10.96 ± 0.336<br>h-k    | 0.95 ± 0.045<br>h-m           | 1.08 ± 0.039<br>a-k             | 16.95 ± 0.289<br>i-p                  | 16.98 ± 0.342<br>k-n                  | 21.24 ± 0.371<br>e-i               |
| Aggouromanakolia | 2.44 ± 0.124<br>b-g          | 9.22 ± 0.331<br>e-j     | 0.80 ± 0.029<br>f-l           | 0.76 ± 0.009<br>a-i             | 15.00 ± 0.204<br>d-l                  | 15.07 ± 0.256<br>g-k                  | 20.16 ± 0.626<br>c-g               |
| Amfissis         | 8.91 ± 0.177 o               | 21.59 ± 0.277 s         | 2.43 ± 0.065<br>v             | 1.82 ± 0.079<br>j-l             | 23.49 ± 0.225<br>t-w                  | 24.05 ± 0.262<br>u-w                  | 29.49 ± 0.432<br>p-r               |
| Amigdalolia      | 11.22 ± 0.505<br>p           | 25.95 ± 0.728 s         | 1.37 ± 0.147<br>n-q           | 1.62 ± 0.109<br>f-l             | 24.04 ± 0.459<br>u-w                  | 24.23 ± 0.415<br>u-w                  | 38.89 ± 0.529<br>u                 |
| Arbequina        | 2.00 ± 0.097<br>a-e          | 7.94 ± 0.258 b-<br>g    | 0.96 ± 0.022<br>h-m           | 0.80 ± 0.024<br>a-g             | 14.72 ± 0.246<br>c-k                  | 14.46 ± 0.186<br>e-j                  | 16.98 ± 0.218<br>b                 |

|                   |                      |                       |                     |                     |                      |                      |                      |
|-------------------|----------------------|-----------------------|---------------------|---------------------|----------------------|----------------------|----------------------|
| Asprolia          | 5.95 ± 0.236 j-      | 16.39 ± 0.432         | 2.07 ± 0.084        | 1.80 ± 0.074        | 21.56 ± 0.540        | 22.04 ± 0.210        | 23.43 ± 0.369        |
| Alexandroupolis   | m                    | n-p                   | t-v                 | i-l                 | q-v                  | s-u                  | h-l                  |
| Asprolia Lefkados | 0.98 ± 0.066<br>ab   | 5.09 ± 0.252 ab       | 0.21 ± 0.028<br>a   | 0.30 ± 0.024<br>a   | 10.31 ± 0.178<br>ab  | 10.62 ± 0.295<br>ab  | 17.71 ± 0.436<br>b-d |
| Chalkidikis       | 8.15 ± 0.369<br>no   | 20.65 ± 0.707<br>rs   | 1.87 ± 0.131<br>r-u | 1.49 ± 0.117<br>e-l | 18.68 ± 3.958<br>l-r | 22.52 ± 0.323<br>t-v | 31.40 ± 0.407<br>rs  |
| Chondrolia        | 10.86 ± 0.930        | 24.83 ± 1.325         | 2.19 ± 0.102        | 1.94 ± 0.172        | 24.52 ± 0.841        | 24.29 ± 0.895        | 33.90 ± 0.563        |
| Chalkidikis       | p                    | t                     | uv                  | k-l                 | uw                   | vw                   | st                   |
| Chrisolia         | 0.48 ± 0.062 a       | 3.01 ± 0.264<br>a     | 0.42 ± 0.046<br>a-e | 0.41 ± 0.047<br>a-d | 9.56 ± 0.438 l       | 9.58 ± 0.451<br>a    | 9.93 ± 0.344<br>a    |
| Dafnelia          | 1.30 ± 0.042<br>a-c  | 5.99 ± 0.132 b-<br>d  | 0.51 ± 0.040<br>a-f | 0.40 ± 0.030<br>a-d | 12.14 ± 0.237<br>a-e | 12.16 ± 0.130<br>b-d | 17.00 ± 0.112<br>b   |
| Dopia Zakynthou   | 1.19 ± 0.052<br>a-c  | 5.67 ± 0.152<br>a-c   | 0.37 ± 0.016<br>a-c | 0.35 ± 0.036<br>ab  | 11.64 ± 0.251<br>a-d | 11.58 ± 0.281<br>a-c | 17.37 ± 0.167<br>b-d |
| Frantoio          | 1.75 ± 0.018<br>a-d  | 7.39 ± 0.050 b-<br>g  | 1.75 ± 0.032<br>a-f | 0.53 ± 0.019<br>a-e | 13.09 ± 0.079<br>a-i | 13.15 ± 0.103<br>c-g | 19.47 ± 0.187<br>b-f |
| Frantoio Rodou    | 2.26 ± 0.067<br>b-f  | 8.81 ± 0.172 d-<br>i  | 0.69 ± 0.053<br>c-i | 1.75 ± 1.146<br>h-l | 14.35 ± 0.281<br>c-k | 14.03 ± 0.166<br>d-i | 21.29 ± 0.350<br>e-i |
| Gaidourelia       | 11.28 ± 0.461<br>p   | 25.98 ± 0.701 s       | 1.11 ± 0.091<br>k-n | 1.67 ± 0.087<br>g-l | 23.58 ± 0.243<br>t-w | 23.73 ± 0.311<br>u-w | 39.99 ± 0.869<br>u   |
| Galatistas        | 3.71 ± 0.343<br>f-i  | 12.15 ± 0.709 j-<br>m | 1.14 ± 0.042<br>l-n | 0.86 ± 0.086<br>a-g | 17.17 ± 0.517<br>j-p | 17.14 ± 0.438<br>k-n | 23.80 ± 0.921<br>i-n |
| Kalamon           | 3.80 ± 0.341<br>f-i  | 12.72 ± 0.705<br>k-m  | 0.99 ± 0.054<br>i-m | 0.87 ± 0.220<br>a-j | 17.15 ± 0.667<br>j-p | 16.97 ± 0.966<br>k-n | 26.17 ± 0.776<br>l-o |
| Kalokerida        | 3.77 ± 0.311<br>f-i  | 12.54 ± 0.700<br>k-m  | 0.98 ± 0.061<br>i-m | 0.43 ± 0.178<br>a-d | 16.93 ± 0.358<br>i-p | 16.74 ± 0.428<br>km  | 26.80 ± 1.372<br>n-p |
| Karolia           | 6.95 ± 0.427 l-<br>n | 19.48 ± 0.863<br>q-s  | 1.41 ± 0.072<br>n-q | 1.08 ± 0.063<br>a-k | 20.45 ± 0.420<br>p-u | 20.73 ± 0.519<br>q-t | 31.82 ± 0.684<br>rs  |
| Karidolia         | 12.06 ± 0.546<br>p   | 26.53 ± 0.827 s       | 1.96 ± 0.071<br>s-u | 2.19 ± 0.137 l      | 25.62 ± 0.452<br>w   | 25.91 ± 0.368<br>w   | 35.00 ± 0.524<br>t   |
| Kolireiki Ilias   | 4.55 ± 0.188<br>h-j  | 14.02 ± 0.387 l-<br>n | 1.30 ± 0.070<br>m-p | 0.81 ± 0.021<br>a-g | 18.08 ± 0.330<br>k-q | 18.00 ± 0.140<br>l-o | 26.24 ± 0.306<br>l-o |
| Kolimbada         | 6.29 ± 0.374<br>k-m  | 17.00 ± 0.664<br>o-q  | 1.80 ± 0.086<br>r-t | 1.61 ± 0.159<br>f-l | 21.05 ± 0.407<br>q-v | 21.39 ± 0.603<br>r-t | 25.95 ± 0.284<br>k-o |

|                      |                      |                       |                     |                     |                      |                      |                      |
|----------------------|----------------------|-----------------------|---------------------|---------------------|----------------------|----------------------|----------------------|
| Koroneiki            | 1.42 ± 0.046<br>a-c  | 6.47 ± 0.133 b-<br>e  | 0.46 ± 0.018<br>a-f | 0.44 ± 0.021<br>a-d | 12.37 ± 0.131<br>a-f | 12.11 ± 0.085<br>b-d | 19.06 ± 0.393<br>b-e |
| Kothreiki            | 5.62 ± 0.498 j-<br>l | 15.79 ± 0.907<br>n-p  | 1.84 ± 0.114<br>r-u | 1.43 ± 0.108<br>d-l | 20.46 ± 0.591<br>p-u | 20.25 ± 0.778<br>p-s | 24.81 ± 0.542<br>j-o |
| Koutsourelia         | 2.71 ± 0.065<br>c-g  | 10.13 ± 0.304<br>g-k  | 0.73 ± 0.033<br>c-j | 0.62 ± 0.101<br>a-f | 15.75 ± 0.245<br>e-m | 15.39 ± 0.069<br>h-k | 22.61 ± 0.292<br>f-j |
| Lefkolia Serron      | 8.09 ± 0.306<br>no   | 20.13 ± 0.474<br>rs   | 1.58 ± 0.143<br>o-r | 1.75 ± 0.125<br>h-l | 22.74 ± 0.381<br>k-l | 22.48 ± 0.452<br>t-v | 30.14 ± 0.531<br>qr  |
| Lianolia Kerkiras    | 1.56 ± 0.122<br>a-c  | 6.95 ± 0.363 b-<br>f  | 0.38 ± 0.029<br>a-d | 0.33 ± 0.033<br>ab  | 12.29 ± 0.326<br>a-e | 12.13 ± 0.379<br>b-d | 20.46 ± 0.516<br>d-h |
| Lianomanako<br>Tirou | 2.05 ± 0.093<br>a-e  | 8.16 ± 0.241<br>c-i   | 0.77 ± 0.028<br>e-l | 0.72 ± 0.037<br>a-k | 14.54 ± 0.168<br>c-k | 14.50 ± 0.315<br>f-j | 18.19 ± 0.313<br>b-e |
| Makris               | 6.26 ± 0.190<br>k-m  | 16.97 ± 0.330<br>n-q  | 1.93 ± 0.073<br>r-u | 1.84 ± 0.081<br>j-l | 22.05 ± 0.425<br>r-w | 22.07 ± 0.238<br>s-u | 24.54 ± 0.028<br>j-n |
| Manzanilla           | 4.73 ± 0.273<br>h-k  | 14.18 ± 0.543<br>m-o  | 1.67 ± 0.065<br>q-s | 1.20 ± 0.052<br>a-l | 19.06 ± 0.316<br>m-s | 19.15 ± 0.301<br>n-q | 24.04 ± 0.549<br>i-n |
| Mastoidis            | 1.88 ± 0.033<br>a-d  | 7.84 ± 0.104 b-<br>g  | 0.55 ± 0.011<br>a-f | 0.43 ± 0.020<br>a-d | 13.35 ± 0.109<br>a-j | 13.25 ± 0.094<br>c-h | 21.17 ± 0.305<br>e-i |
| Matolia Ilias        | 1.40 ± 0.160<br>a-c  | 6.31 ± 0.482 b-<br>e  | 0.49 ± 0.017<br>a-f | 0.50 ± 0.037<br>a-e | 12.38 ± 0.387<br>a-f | 12.28 ± 0.409<br>b-e | 17.44 ± 0.852<br>b-d |
| Mavrelia             | 1.07 ± 0.043<br>ab   | 5.36 ± 0.140<br>a-c   | 0.31 ± 0.027<br>ab  | 0.36 ± 0.015<br>a-c | 11.07 ± 0.107<br>a-c | 10.95 ± 0.321<br>ab  | 17.13 ± 0.218<br>bc  |
| Mavrelia Serron      | 5.02 ± 0.270 i-<br>k | 14.62 ± 0.534<br>m-o  | 1.64 ± 0.060<br>p-s | 1.60 ± 0.038<br>f-l | 20.28 ± 0.454<br>o-u | 20.02 ± 0.202<br>o-s | 23.22 ± 0.598<br>g-l |
| Mavrelia Lefkadas    | 1.51 ± 0.033<br>a-c  | 6.69 ± 0.091 b-<br>f  | 0.57 ± 0.028<br>a-g | 0.46 ± 0.039<br>a-e | 12.83 ± 0.116<br>a-h | 12.68 ± 0.159<br>b-f | 17.94 ± 0.337<br>b-d |
| Megaritiki           | 3.54 ± 0.061<br>e-i  | 11.84 ± 0.149 j-<br>m | 0.62 ± 0.046<br>b-i | 0.94 ± 0.024<br>a-k | 16.74 ± 0.051<br>i-p | 16.60 ± 0.132<br>j-m | 24.90 ± 0.377<br>j-o |
| Mirtolia             | 1.95 ± 0.132<br>a-e  | 7.87 ± 0.371 b-<br>g  | 0.60 ± 0.047<br>b-h | 0.66 ± 0.033<br>a-g | 14.07 ± 0.207<br>b-j | 13.87 ± 0.335<br>d-h | 18.84 ± 0.385<br>b-e |
| Petrolia             | 3.92 ± 0.148<br>g-i  | 12.58 ± 0.301<br>k-m  | 1.41 ± 0.063<br>n-q | 1.09 ± 0.048<br>a-k | 18.09 ± 0.477<br>k-q | 17.96 ± 0.285<br>l-o | 22.75 ± 0.318<br>g-j |
| Picual               | 3.23 ± 0.357<br>d-h  | 11.13 ± 0.807 i-<br>l | 0.99 ± 0.098<br>i-l | 0.85 ± 0.060<br>a-g | 16.40 ± 0.579<br>g-n | 16.30 ± 0.458<br>j-m | 22.95 ± 1.136<br>g-k |



|                      |                  |                   |                  |                  |                   |                   |                   |
|----------------------|------------------|-------------------|------------------|------------------|-------------------|-------------------|-------------------|
| Pierias              | 5.70 ± 0.337 j-l | 16.17 ± 0.646 n-p | 1.25 ± 0.092 m-o | 0.83 ± 0.204 a-g | 19.83 ± 0.401 n-t | 19.75 ± 0.590 o-r | 27.82 ± 0.499 o-q |
| Pierias Skotiniotiki | 4.73 ± 0.410 h-k | 14.25 ± 0.840 m-o | 1.08 ± 0.060 j-n | 1.05 ± 0.064 a-k | 18.13 ± 0.549 k-q | 18.45 ± 0.360 m-p | 26.62 ± 0.997 m-p |
| Pikrolia             | 2.00 ± 0.146 a-e | 8.14 ± 0.404 c-h  | 0.62 ± 0.019 b-i | 0.48 ± 0.010 a-e | 13.74 ± 0.330 b-j | 13.86 ± 0.239 d-h | 20.17 ± 0.549 c-g |
| Rachati              | 2.50 ± 0.143 b-g | 9.50 ± 0.366 f-j  | 0.57 ± 0.037 a-g | 0.41 ± 0.058 a-d | 14.70 ± 0.317 c-k | 15.05 ± 0.319 g-k | 23.56 ± 0.756 h-m |
| Stroggilolia         | 6.81 ± 0.184 l-n | 18.16 ± 0.322 p-r | 1.25 ± 0.060 m-o | 1.37 ± 0.071 b-l | 21.12 ± 0.229 q-v | 21.06 ± 0.195 q-t | 29.65 ± 0.478 p-r |
| Thiaki               | 1.26 ± 0.057 a-c | 5.90 ± 0.186 a-d  | 0.49 ± 0.027 a-f | 0.42 ± 0.037 a-d | 12.66 ± 0.675 a-g | 12.12 ± 0.177 b-d | 16.76 ± 0.293 b   |
| Throumbolia          | 3.57 ± 0.076 e-i | 12.09 ± 0.187 j-m | 0.71 ± 0.013 c-i | 0.66 ± 0.061 a-g | 16.57 ± 0.086 h-o | 16.42 ± 0.175 j-m | 26.69 ± 0.310 m-p |
| Thassou              | 3.20 ± 0.065 d-h | 11.06 ± 0.150 h-k | 0.75 ± 0.042 d-k | 0.91 ± 0.046 a-k | 16.20 ± 0.166 f-n | 16.20 ± 0.142 i-l | 23.24 ± 0.305 g-l |
| Throubolia           | 1.41 ± 0.038 a-c | 6.38 ± 0.127 b-e  | 0.51 ± 0.025 a-f | 0.42 ± 0.016 a-d | 12.28 ± 0.104 a-e | 12.35 ± 0.106 b-f | 17.74 ± 0.276 b-d |
| Tragolia             | 5.01 ± 0.471 i-k | 14.76 ± 0.876 m-o | 0.94 ± 0.099 g-m | 1.33 ± 0.096 a-l | 18.88 ± 0.569 m-s | 19.14 ± 0.682 n-q | 26.22 ± 0.707 l-o |
| Valanolia            | 7.48 ± 0.254 m-o | 19.48 ± 0.443 q-s | 1.62 ± 0.025 p-s | 1.41 ± 0.041 c-l | 21.36 ± 0.201 q-v | 21.07 ± 0.331 q-t | 30.45 ± 0.409 qr  |
| Vasilikada           |                  |                   |                  |                  |                   |                   |                   |

| F value   |        |                    |                    |                    |                   |                   |                   |            |
|-----------|--------|--------------------|--------------------|--------------------|-------------------|-------------------|-------------------|------------|
| Source    | Volume | Area               | Up-skin            | Down-skin          | Center of gravity | Center of gravity | Center of gravity |            |
| (a)       | df     | (cm <sup>3</sup> ) | (cm <sup>2</sup> ) | (cm <sup>2</sup> ) | (size) x (cm)     | (size) y (cm)     | (size) z (cm)     |            |
| Cultivars | 49     | 113.398***         | 139.401***         | 76.752***          | 8.617***          | 37.958***         | 124.927***        | 121.106*** |

(a) Values of F: \*P< 0.05 \*\*P< 0.01 \*\*\*P< 0.001

(b) Mean values for each measured parameter within factor, with the same letter are not significantly different (P<0.05) LSD test.
